# Supplementary material for: Laminin β4 is required for the development of human peripheral sensory neurons
Source: PubMed Central journal article supplement (PMC11601542; doi:10.1101/2024.11.22.624899), 2024-11-24
Supplement: media-1.pdf [file media-1.pdf]

# 1 Supplementary Figures

**A**

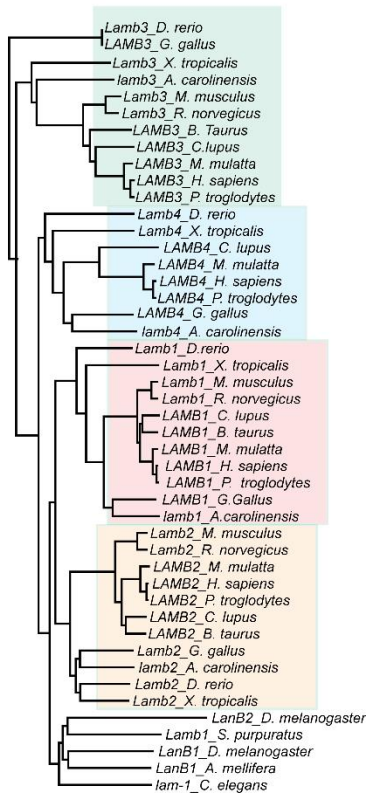

**B**

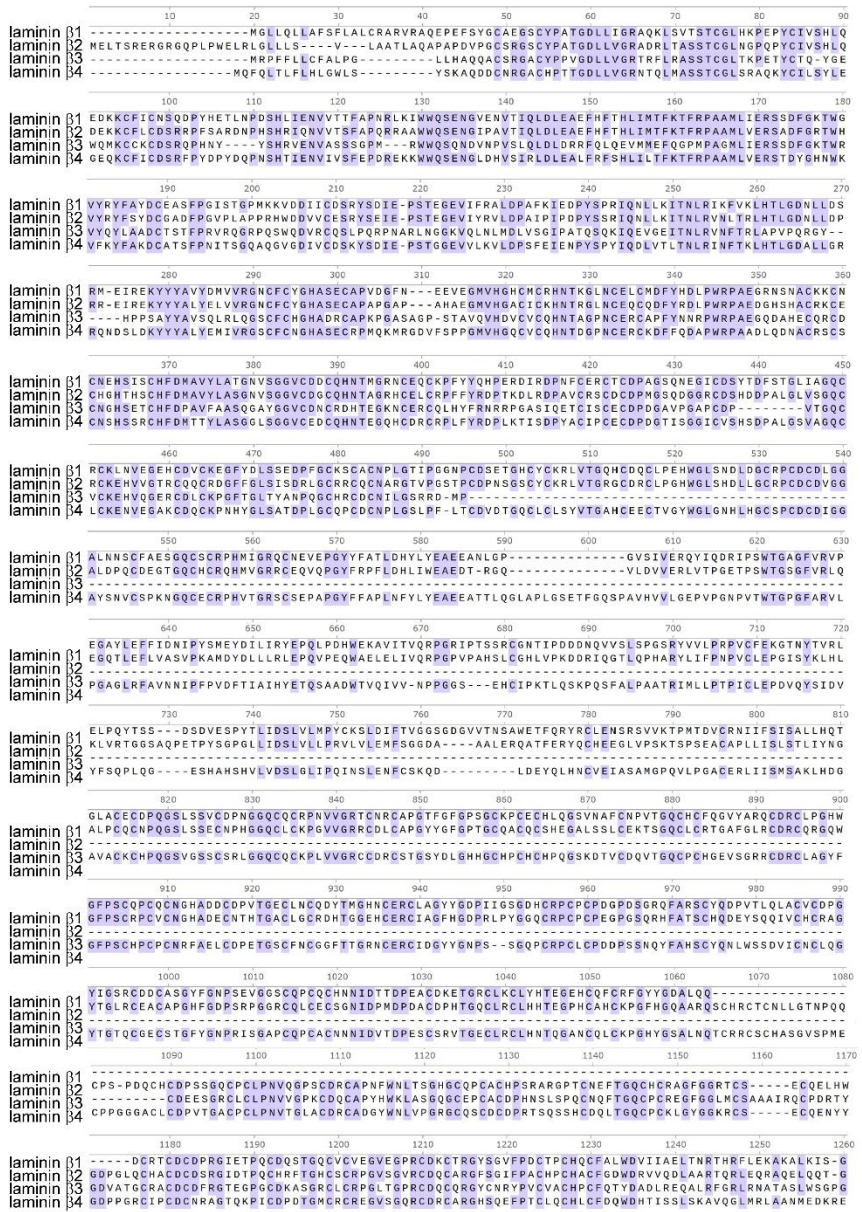

**C**

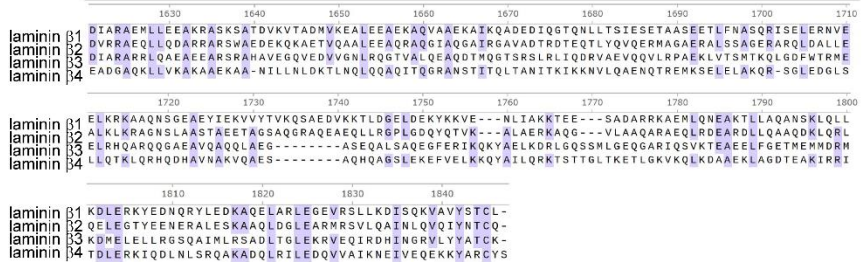

3 **Figure S1. Similarities between *LAMB* genes.** **A)** Dendrogram of the *LAMB* genes among  
4 species. **B and C)** Alignment of regions in the **B)** N-terminal and **C)** C-terminal domains of the  
5 amino acid sequences of the human laminin  $\beta$  chains.

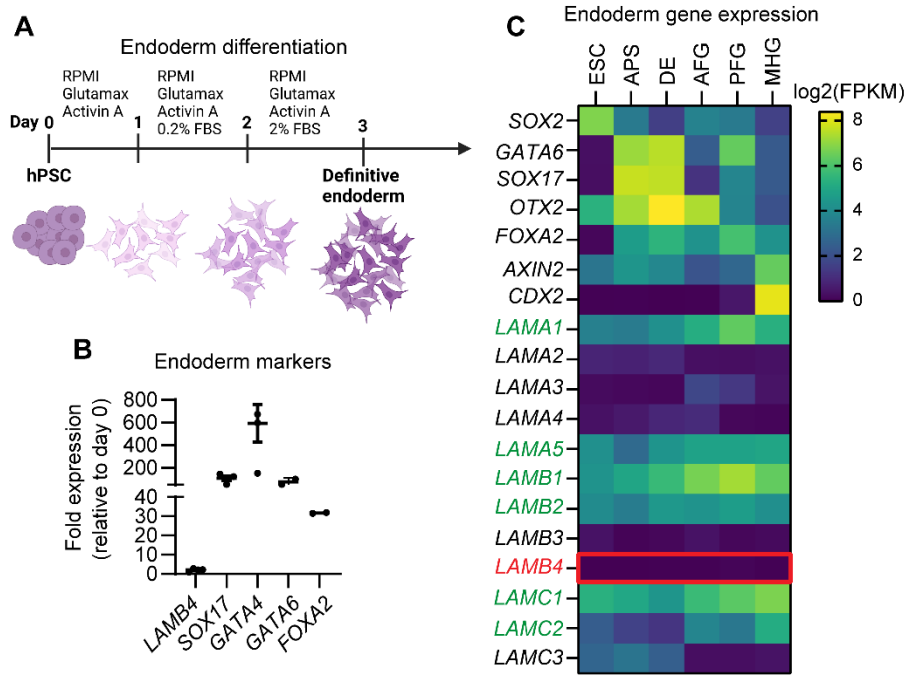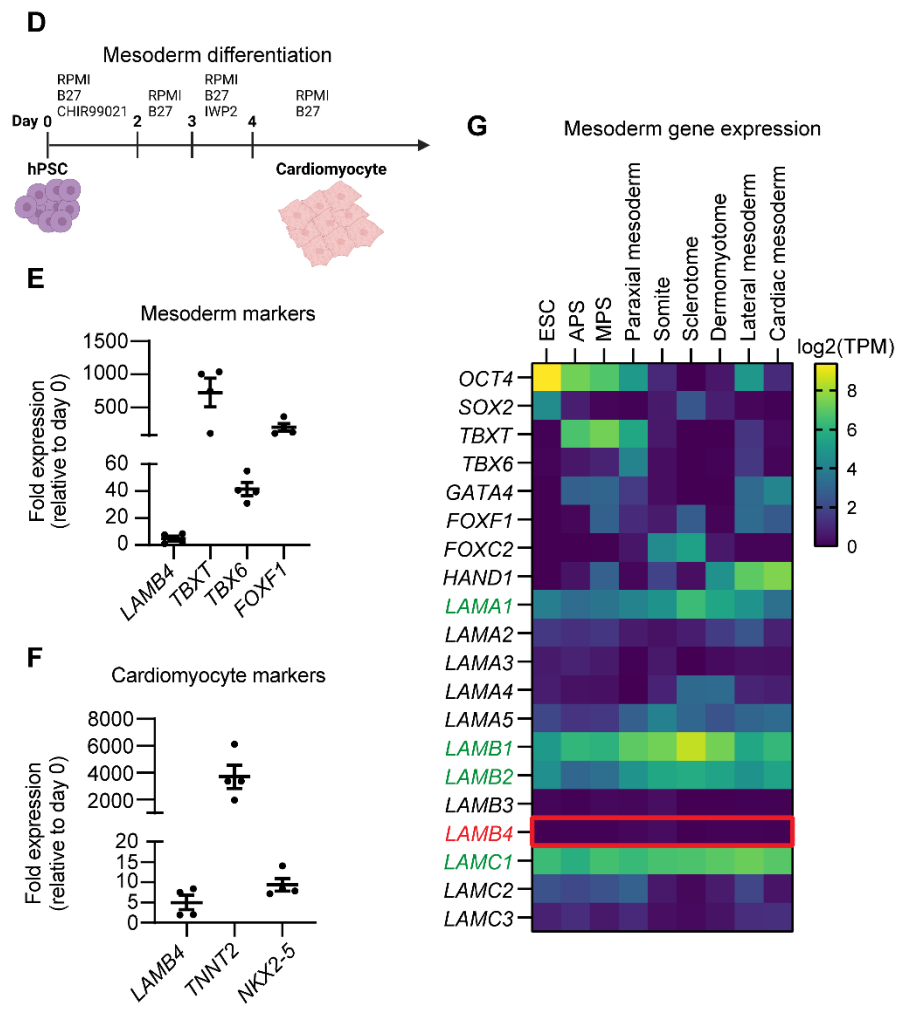

7 **Figure S2. *LAMB4* is not expressed in mesoderm and endoderm.** **A)** Schematic of the  
8 endoderm differentiation protocol. **B)** Gene expression of endoderm markers. hPSC-ctr-H9 cells  
9 were differentiated into endoderm and RNA was isolated on day 3. mRNA levels were measured  
10 using RT-qPCR (n=2-4 biological replicates). **C)** *LAMB4* expression during endoderm  
11 differentiated from hPSCs. **D)** Schematics of the mesoderm differentiation protocol. **E)** Expression  
12 of early mesoderm marker. **F)** Expression of cardiomyocyte-related genes. Previously published  
13 RNAseq data was analyzed to assess the expression of laminin chains. **G)** *LAMB4* expression  
14 from mesoderm and cardiomyocytes differentiated from hPSCs. Highly expressed laminin genes  
15 are shown in green. *LAMB4* shown in red.

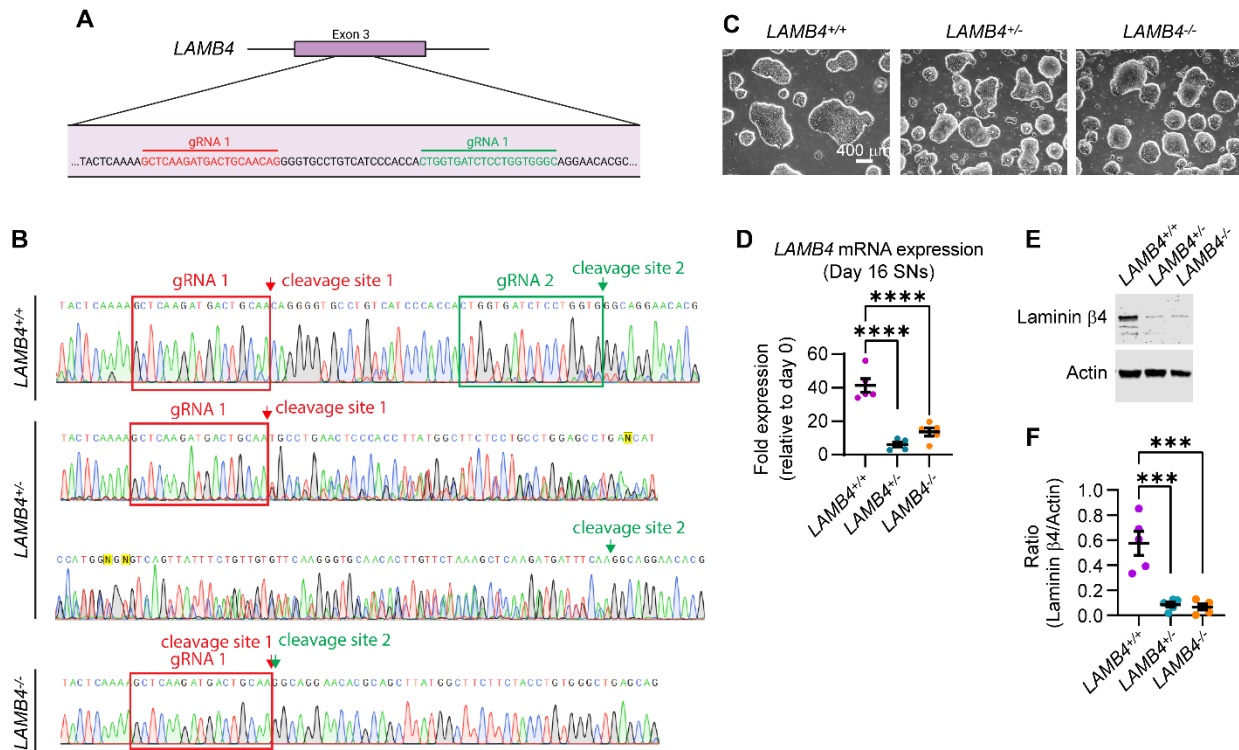

16

17 **Figure S3. *LAMB4* editing strategy and characterization. A)** Schematics of the strategy used  
 18 to edit *LAMB4* by CRISPR/Cas9. **B)** Sequencing results of *LAMB4*<sup>+/+</sup>, *LAMB4*<sup>+/-</sup>, and *LAMB4*<sup>-/-</sup>  
 19 hPSCs. **C)** Characterization of *LAMB4*<sup>+/+</sup>, *LAMB4*<sup>+/-</sup>, and *LAMB4*<sup>-/-</sup> hPSCs by brightfield  
 20 microscopy. **D)** *LAMB4* expression in SNs differentiated from *LAMB4*<sup>+/+</sup>, *LAMB4*<sup>+/-</sup>, and *LAMB4*<sup>-/-</sup>  
 21 hPSCs. RNA was isolated on day 16 and *LAMB4* expression was measured by RT-qPCR (n=5  
 22 biological replicates). **E)** Laminin  $\beta$ 4 levels in *LAMB4*<sup>+/+</sup>, *LAMB4*<sup>+/-</sup>, and *LAMB4*<sup>-/-</sup> SNs. Total protein  
 23 of day 20 SNs was immunoblotted for laminin  $\beta$ 4 and actin. **F)** Measuring of signal intensity of the  
 24 immunoblots from **F)** (n=5 biological replicates). For **D)** and **F)**, one-way ANOVA followed by  
 25 Tukey's multiple comparisons test. \*\*\*p<0.001, \*\*\*\*p<0.0001. Graphs show mean  $\pm$  SEM.

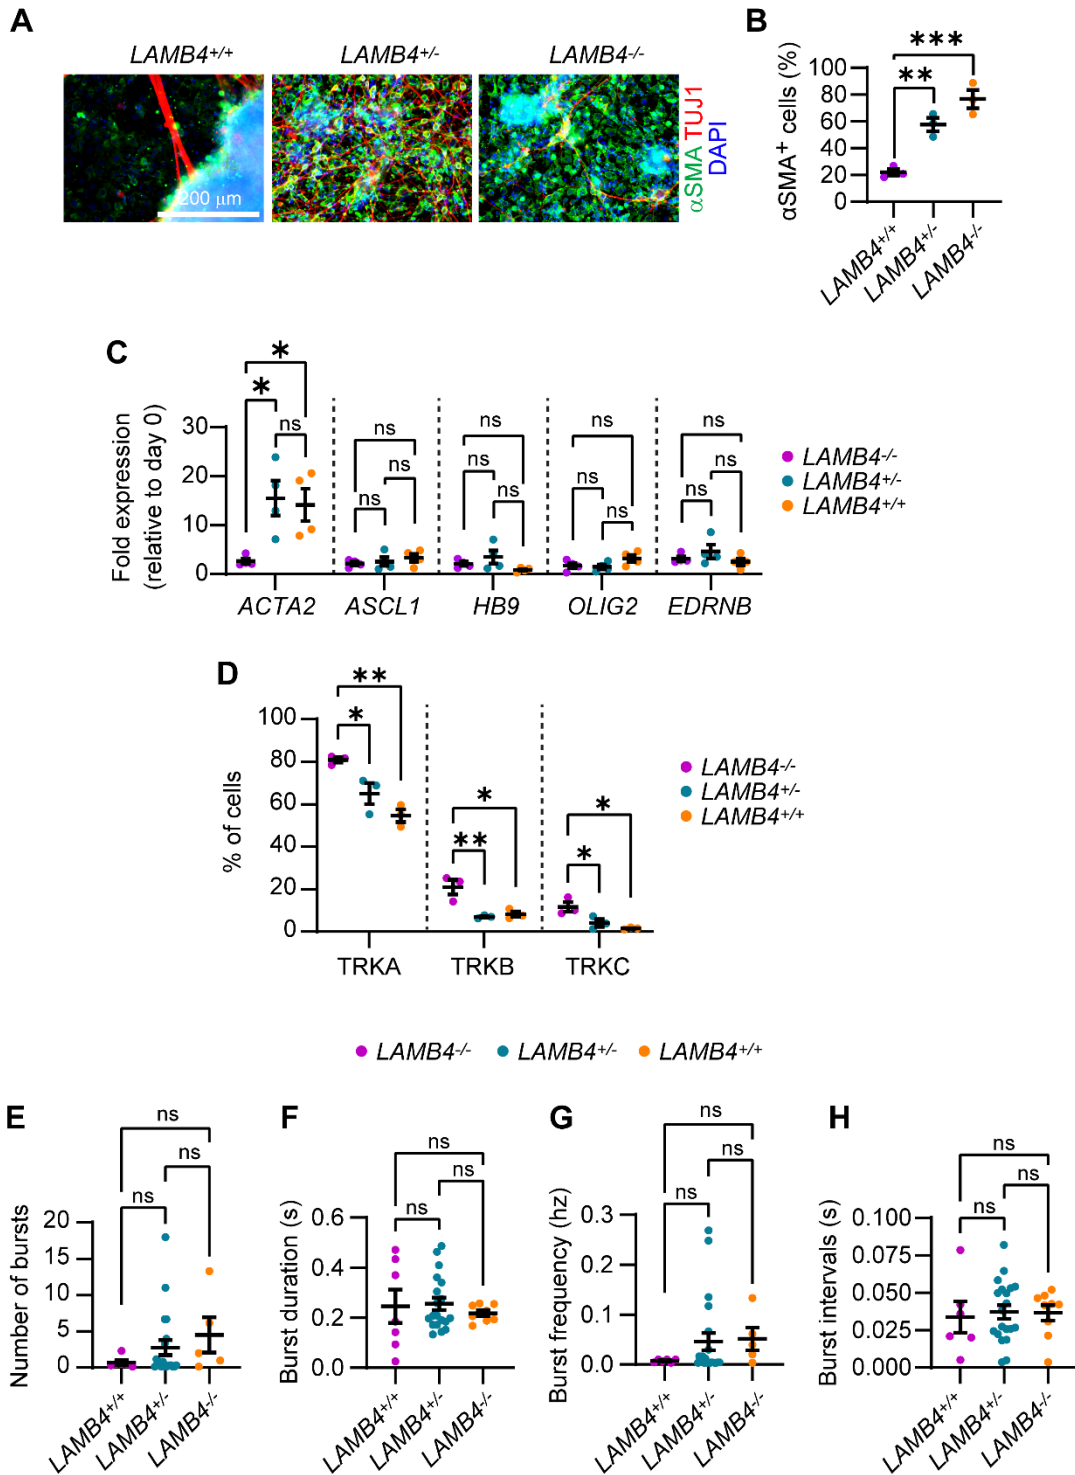

26

27 **Figure S4. Characterization of *LAMB4* mutant SNs.** **A)** Expression of markers upon loss of  
 28 *LAMB4*. *LAMB4<sup>+/+</sup>*, *LAMB4<sup>+/-</sup>*, and *LAMB4<sup>-/-</sup>* SNs were fixed on day 20 and stained for the non-  
 29 neural ectoderm marker  $\alpha$ -Smooth Muscle Actin ( $\alpha$ SMA). Nuclei were stained with DAPI. **B)**

30 Percentage of  $\alpha$ SMA<sup>+</sup> cells from **A)** over DAPI was plotted. **C)** Expression of genes not expressed  
31 in SNs. RNA of day 20 SNs differentiated from *LAMB4*<sup>+/+</sup>, *LAMB4*<sup>+/-</sup>, and *LAMB4*<sup>-/-</sup> hPSCs was  
32 isolated. Gene expression was measured by RT-qPCR (n=4 biological replicates). **D)** Percentage  
33 of cells expressing TRK proteins. Day 20 SNs were stained with TRKA, TRKB, and TRKC  
34 fluorescently-tagged antibodies and analyzed by flow cytometry (n=3 biological replicates). **E-H)**  
35 Measurement of electrical activity of *LAMB4*<sup>+/+</sup>, *LAMB4*<sup>+/-</sup>, and *LAMB4*<sup>-/-</sup> SNs. **E)** Number, **F)**  
36 duration, **G)** Frequency, and **H)** intervals of bursts were measured. Each dot represents the mean  
37 firing rate of 6 wells measured over 40 days (n=4 biological replicates). For **C)**, one-way ANOVA  
38 followed by Dunnett's multiple comparisons test. For **B)**, **D)**, **E)**, **F)**, **G)**, and **H)** one-way ANOVA  
39 followed by Tukey's multiple comparisons test. ns, non-significant, \*p<0.05, \*\*p<0.005. Graphs  
40 show mean  $\pm$  SEM.

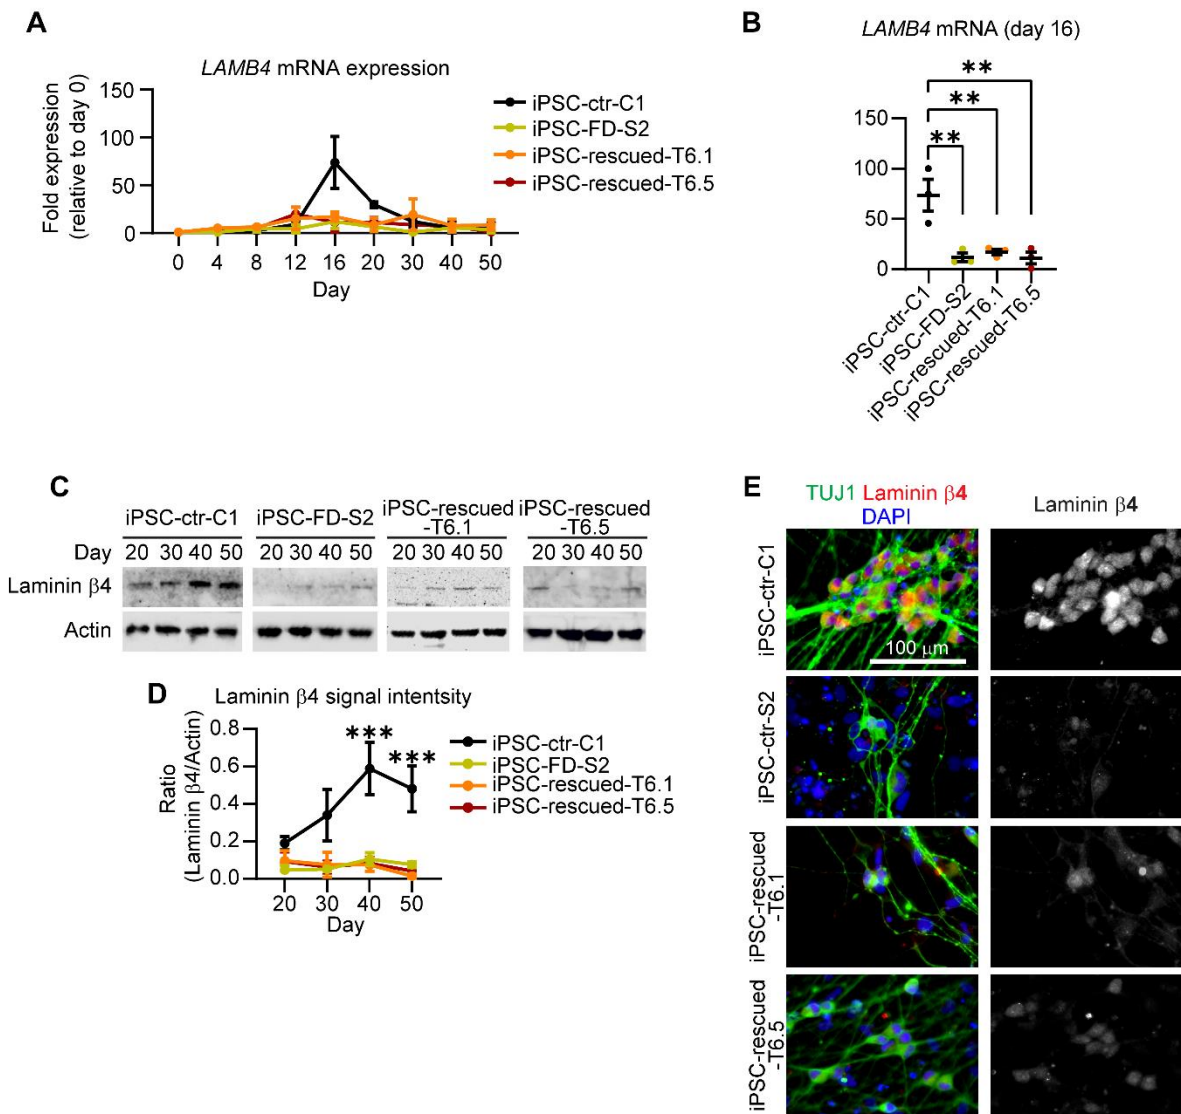

41

42 **Figure S5. *LAMB4* expression is not dependent on *ELP1*.** **A)** *LAMB4* expression in SNs

43 differentiated from *ELP1*-rescued iPSCs of severe FD patients. *ELP1*<sup>+/-</sup> severe FD iPSCs (iPSC-

44 rescued-T6.1 and iPSC-rescued-T6.5), one severe FD iPSC line (S2), and one healthy iPSC

45 control line (C1) were differentiated into SNs. Total RNA was isolated at the indicated times and

46 gene expression was measured by RT-qPCR (n=3 biological replicates). **B)** *LAMB4* expression

47 by SNs on day 16 shown in **A)** is shown (n=3 biological replicates). **C)** Laminin β4 expression

48 during SN development. iPSC-rescued-T6.1, iPSC-rescued-T6.5, iPSC-FD-S2, and iPSC-ctr-C1

49 cells were differentiated into SNs. Lysates were collected on the indicated days and were



50 immunoblotted for laminin  $\beta$ 4 and actin. **D)** Quantification of signal intensity of immunoblots shown  
51 in **C)** (n=3 biological replicates). **E)** Laminin  $\beta$ 4 in *ELP1*-rescued severe FD SNs. iPSC-rescued-  
52 T6.1, iPSC-rescued-T6.5, iPSC-FD-S2, and iPSC-ctr-C1 hPSCs were differentiated into SNs.  
53 Cells were fixed on day 20 and stained for laminin  $\beta$ 4, TUJ1, and DAPI. For **B)**, one-way ANOVA  
54 followed by Tukey's multiple comparisons test. For **D)**, two-way ANOVA followed by Šídák's  
55 multiple comparisons test. \*\*p<0.005, \*\*\*p<0.001. Graphs show mean  $\pm$  SEM.

**Supplementary Table 1** - List of primers used in this study

| Gene          | Forward sequence        | Reverse sequence         |
|---------------|-------------------------|--------------------------|
| <i>SOX10</i>  | CCAGGCCCACTACAAGAGC     | CTCTGGCCTGAGGGGTGC       |
| <i>P75NTR</i> | CCTCATCCCTGTCTATTGCTCC  | GTTGGCTCCTTGCTTGTTCTGC   |
| <i>NGN1</i>   | GCCTCCGAAGACTTCACCTACC  | GGAAAGTAACAGTGTCTACAAAGG |
| <i>NGN2</i>   | CAAGCTCACCAAGATCGAGACC  | AGCAACACTGCCTCGGAGAAGA   |
| <i>BRN3A</i>  | AGTACCCGTCGCTGCACTCCA   | TTGCCCTGGGACACGGCGATG    |
| <i>RUNX1</i>  | CCACCTACCACAGAGCCATCAA  | TTCACTGAGCCGCTCGGAAAAG   |
| <i>RUNX3</i>  | GGCAATGACGAGAACTACTCCG  | GATGGTCAGGGTGAAACTCTTCC  |
| <i>TRKA</i>   | CACTAACAGCACATCTGGAGACC | ACAGTCAGCTCAAGCCAGACAC   |
| <i>TRKB</i>   | ACAGTCAGCTCAAGCCAGACAC  | GTCCTGCTCAGGACAGAGGTTA   |
| <i>TRKC</i>   | CCGACACTGTGGTCATTGGCAT  | CAGTTCTCGCTTCAGCACGATG   |
| <i>TBXT</i>   | CCTTCAGCAAAGTCAAGCTCACC | TGAACTGGGTCTCAGGGAAGCA   |
| <i>TBX6</i>   | TCATCTCCGTGACAGCCTACCA  | CCGCAGTTTCCTCTTCACACGG   |
| <i>FOXF1</i>  | CAGCCTCACATCACGCAAGG    | AGCCGAGCTGCAAGGCATC      |
| <i>TNNT2</i>  | AAGAGGCAGACTGAGCGGGAAA  | AGATGCTCTGCCACAGCTCCTT   |
| <i>NKK2-5</i> | AAGTGTGCGTCTGCCTTTCCCG  | TTGTCCGCCTCTGTCTTCTCCA   |
| <i>GAPDH</i>  | GTCTCCTCTGACTTCAACAGCG  | ACCACCCTGTTGCTGTAGCCAA   |
| <i>LAMA1</i>  | GAAGGTGACTGGCTCAGCAAGT  | AGGCGTCACAACGGAAATCGTG   |
| <i>LAMA2</i>  | GGCAATCTGAATACACTCGTGAC | TGTGTTGGTCCTCTCAGCATCC   |
| <i>LAMA3</i>  | TAGAGGAAGCCTCTGACACAGG  | CCGATAGTATCCAGGGCTACAAC  |
| <i>LAMA4</i>  | GAGATGACTCTCTGCTGGACCT  | AGTTCCAGGCAGCCAACAAAGC   |
| <i>LAMA5</i>  | AACCAGATGAGCATCACATTCTG | ACAGTGTTGCGCGTCTCCGTAT   |
| <i>LAMB1</i>  | GAGGTGTCTCAAGTGCCTGTAC  | ACTGGCAGTCAGAGCCGTTACA   |
| <i>LAMB2</i>  | GCGGACTTGTTCTGAGTGCCAA  | ACCTGTGAAGCGGTGACACTGA   |
| <i>LAMB3</i>  | GTCACAGAGCAGGAGGTGGCT   | GCTTCTGTCAAGACTCTCCAGG   |
| <i>LAMB4</i>  | GTGGAGGCTTTACAACCTGGCAG | GGATCATCTGGACACAGGCAAG   |
| <i>LAMC1</i>  | CTGTGAGGTCAACCACTTTGGG  | AGCCTTCTCTGCATTACAGCG    |
| <i>LAMC2</i>  | TACAGAGCTGGAAGGCAGGATG  | GTTCTCTTGGCTCCTCACCTTG   |
| <i>LAMC3</i>  | CTGTAACCAGCATGGCACCTGT  | ACCTGGCAAACAGCGTTCACAG   |
